# Supplementary material
Source: PubMed Central journal article supplement (PMC4423371)
Supplement: supp_115.174425_FigureS1.pdf [file supp_115.174425_FigureS1.pdf]

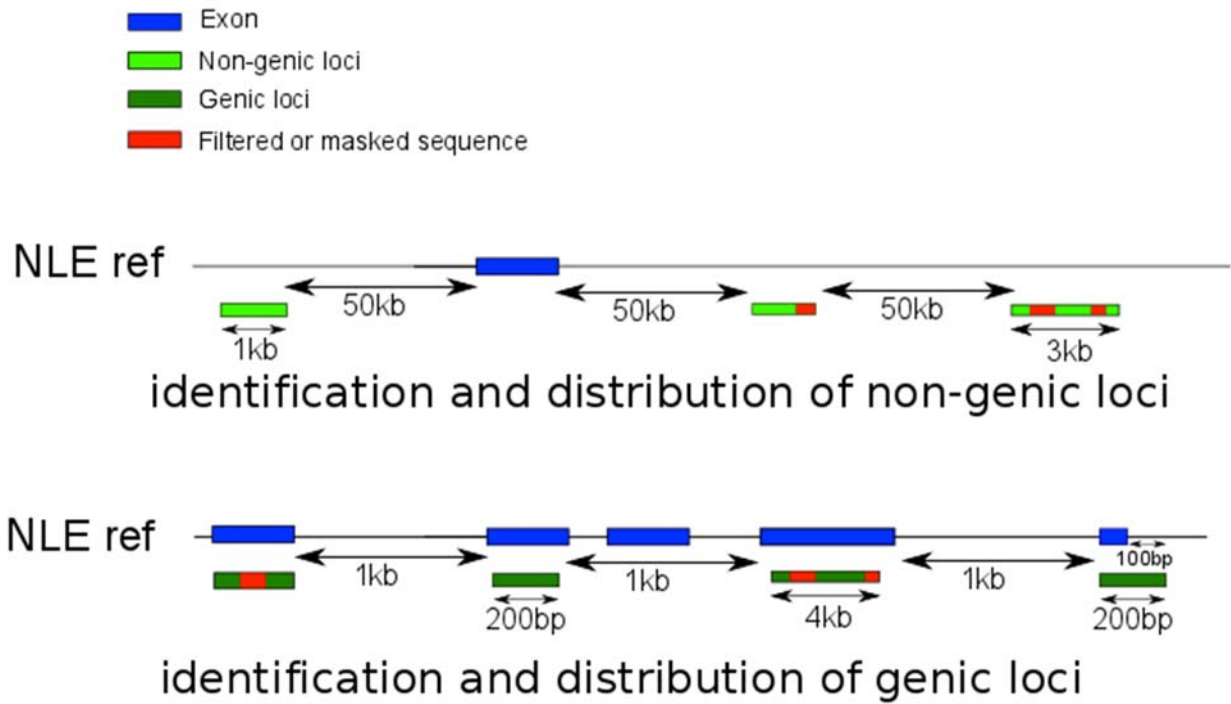

**Figure S1** Cartoon showing the distribution of genic (200bp) and non-genic (1kb) loci identified for phylogenetic analysis of gibbons. Not to scale.
