# Supplementary material
Source: PubMed Central journal article supplement (PMC4423371)
Supplement: supp_115.174425_FigureS3.pdf [file supp_115.174425_FigureS3.pdf]

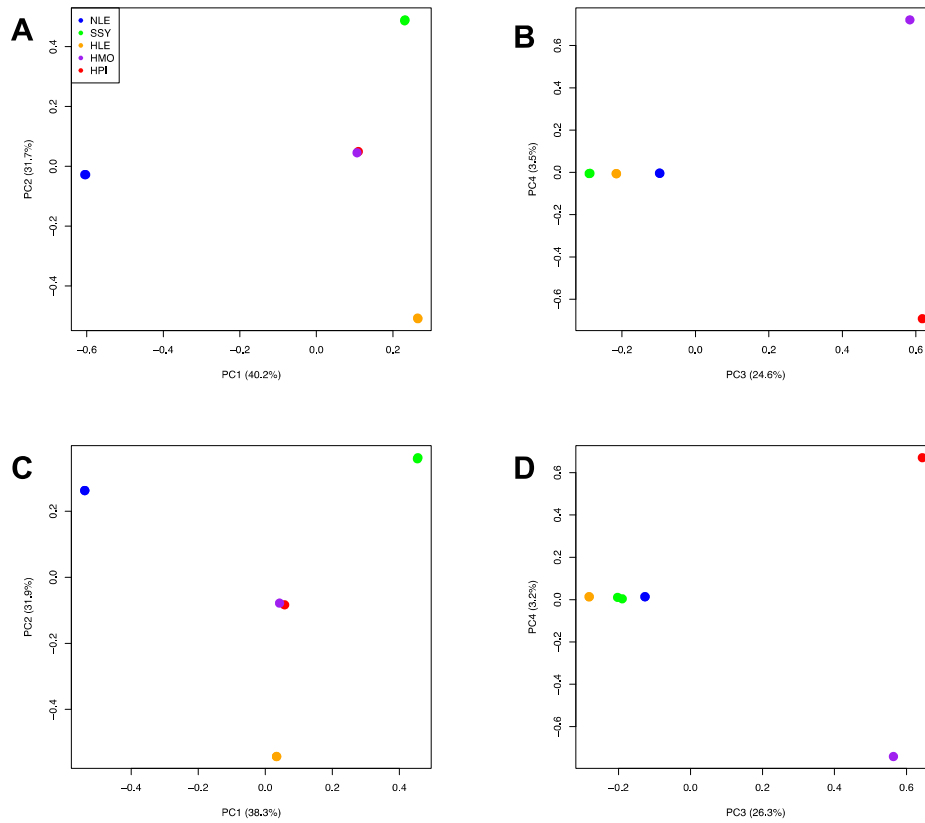

**Figure S3** PCA of all 8 gibbon samples based on high quality genotypes. A) PCA 1v2 for all SNPs, B) PCA 3v4 for all SNPs, C) PCA 1v2 for random 1% of SNPs, D) PCA 3v4 for random 1% of SNPs. Note the two individuals from NLE, SSY and HLE appear as one point on the plot as their PC coordinates were highly similar relative to between species differences.
