# Supplementary material
Source: PubMed Central journal article supplement (PMC4423371)
Supplement: supp_115.174425_FigureS4.pdf [file supp_115.174425_FigureS4.pdf]

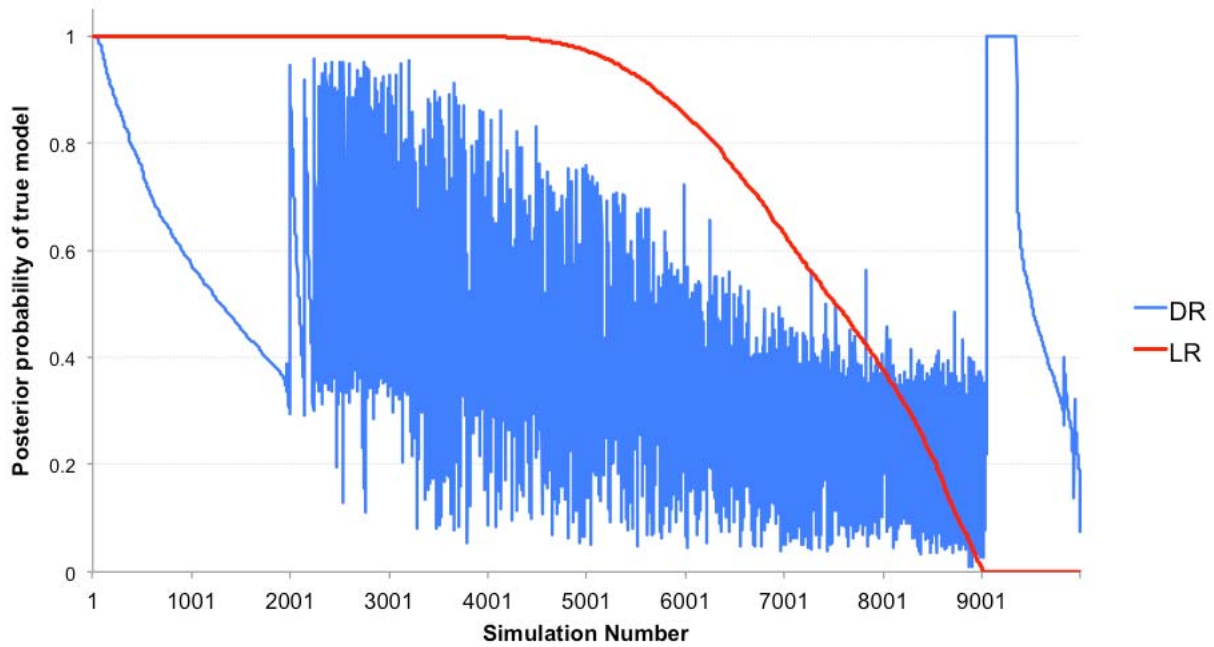

**Figure S4** Relative posterior probabilities as assessed by our ABC framework for 10,000 random simulated topologies (from a total of 15 possible topologies for 4 genera) using the Logistic Regression (LR) and Direct (DR) methods. Simulations are ordered from highest to lowest LR posterior probabilities.
