# Supplementary material
Source: PubMed Central journal article supplement (PMC4423371)
Supplement: supp_115.174425_FigureS6.pdf [file supp_115.174425_FigureS6.pdf]

A

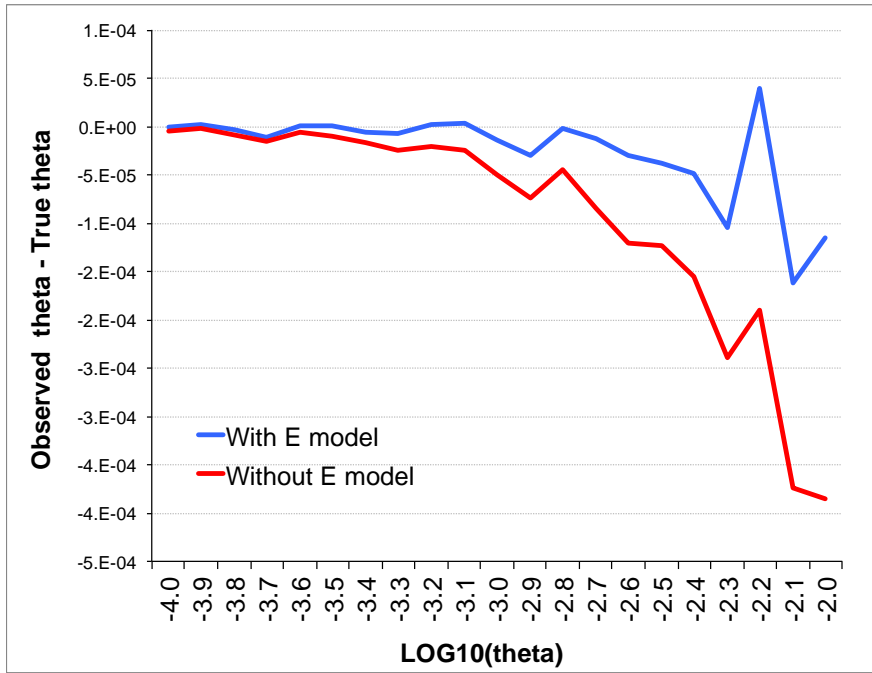

B

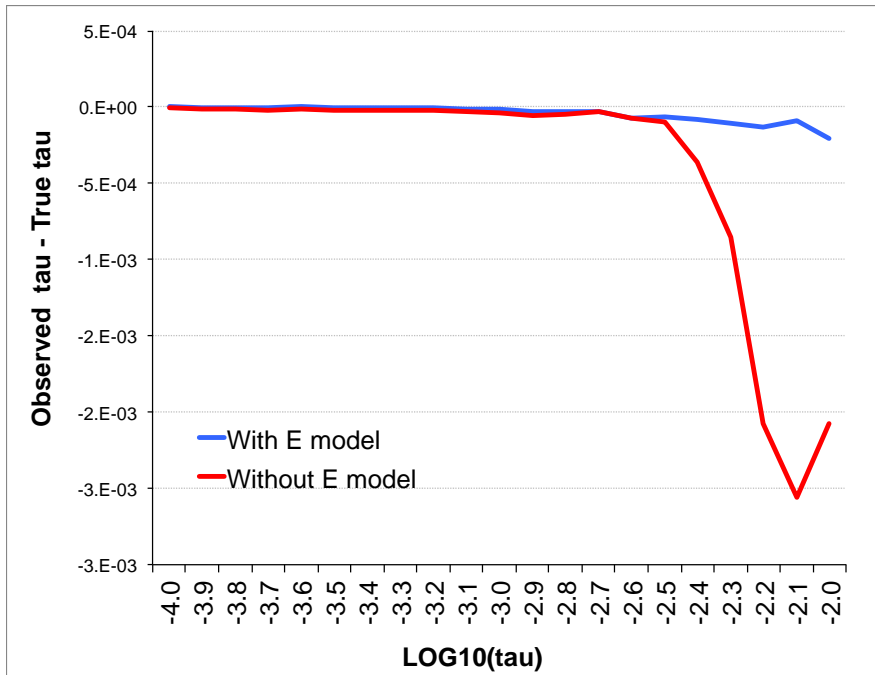

**Figure S6** Comparison of observed versus true parameter value with and without stochastically modeling sequence errors using the *E* model when estimating  $\theta$  in scenario A and  $\tau$  in scenario B.
