# Supplementary material
Source: PubMed Central journal article supplement (PMC4423371)
Supplement: supp_115.174425_FigureS7.pdf [file supp_115.174425_FigureS7.pdf]

**A**

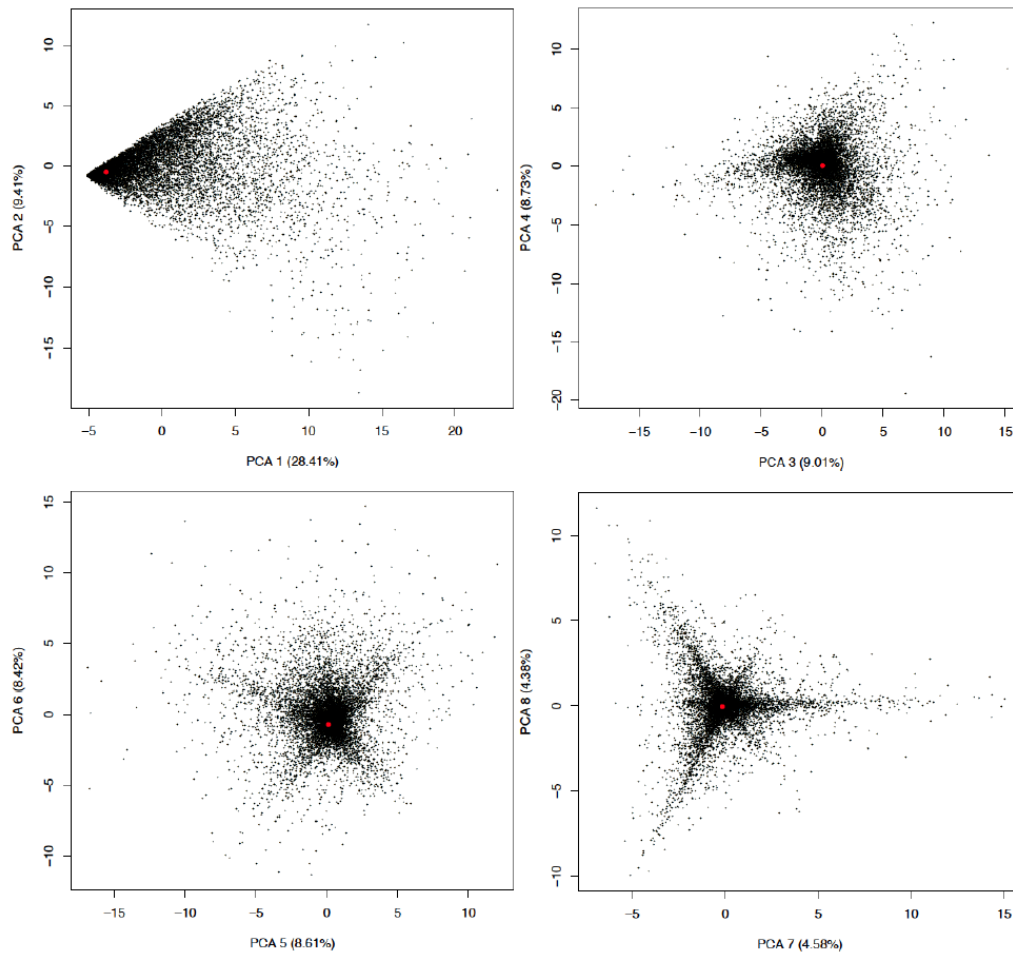

**B**

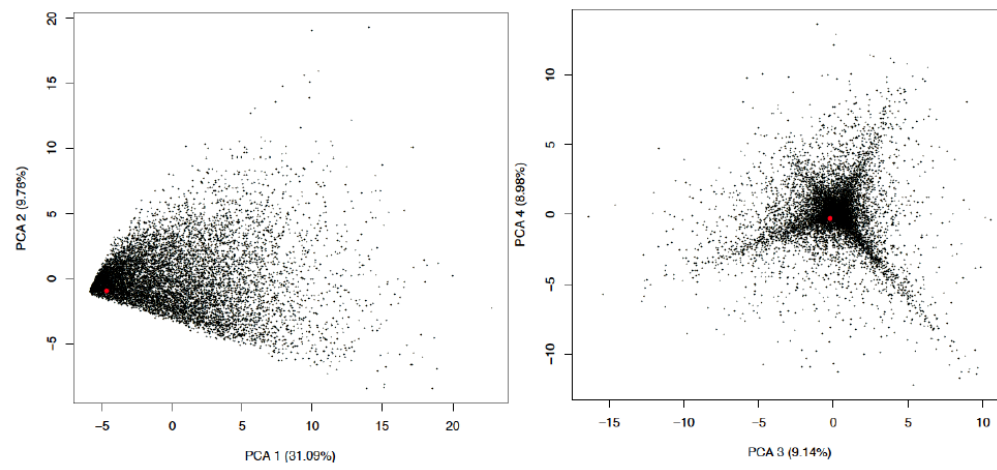

**Figure S7** PCA of corrected simulated and observed (red) summary statistics for non-genic loci (A) and genic loci (B).
