# Supplementary material
Source: PubMed Central journal article supplement (PMC4423371)
Supplement: supp_115.174425_FigureS8.pdf [file supp_115.174425_FigureS8.pdf]

A

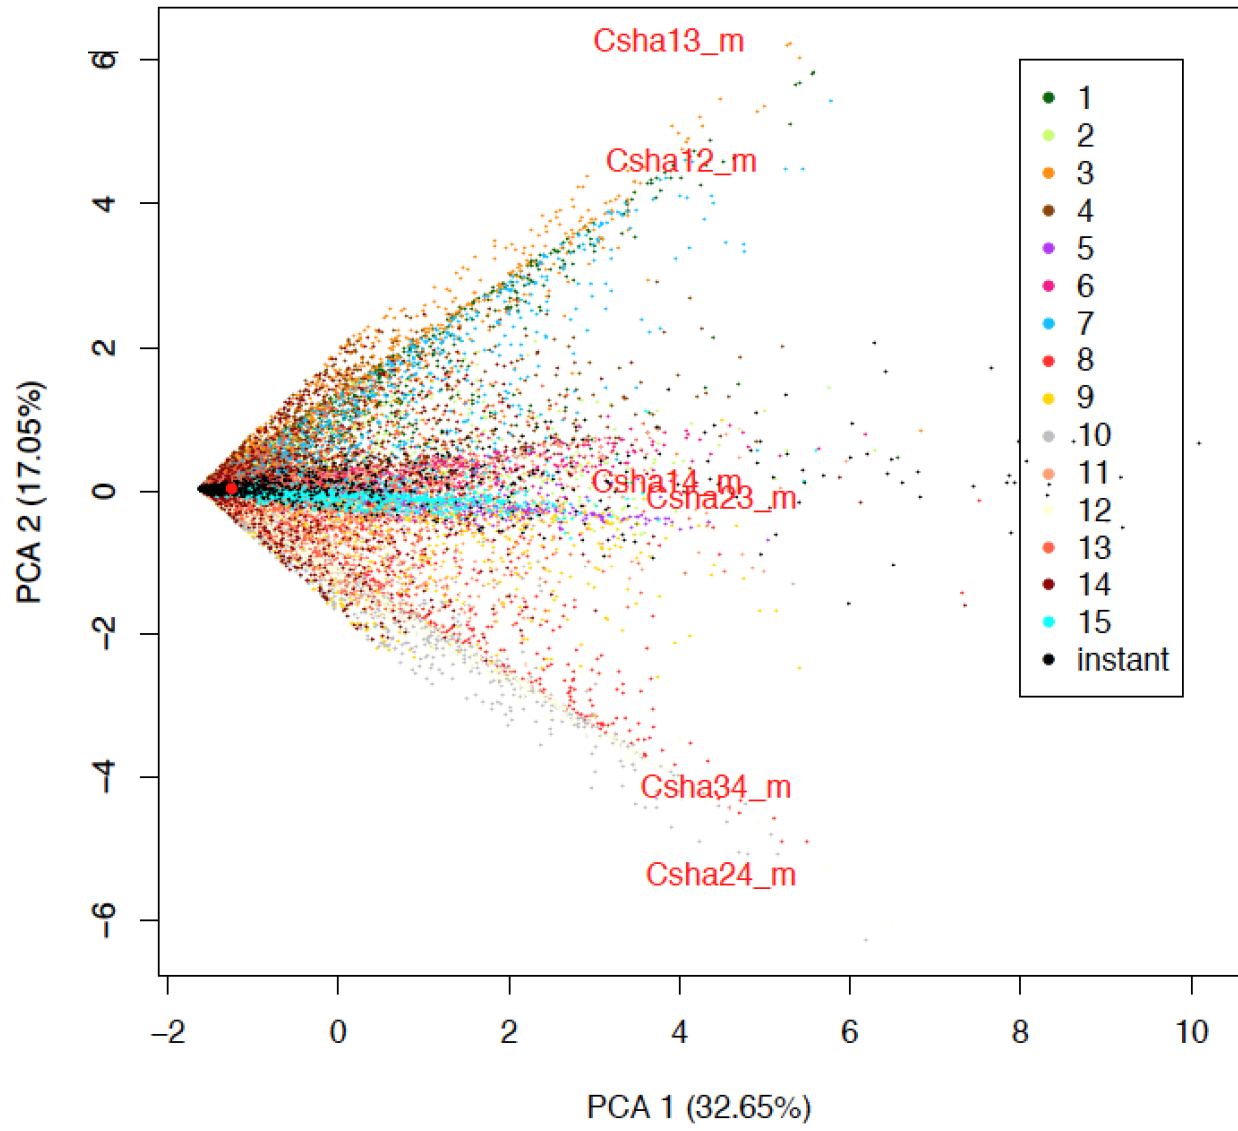

B

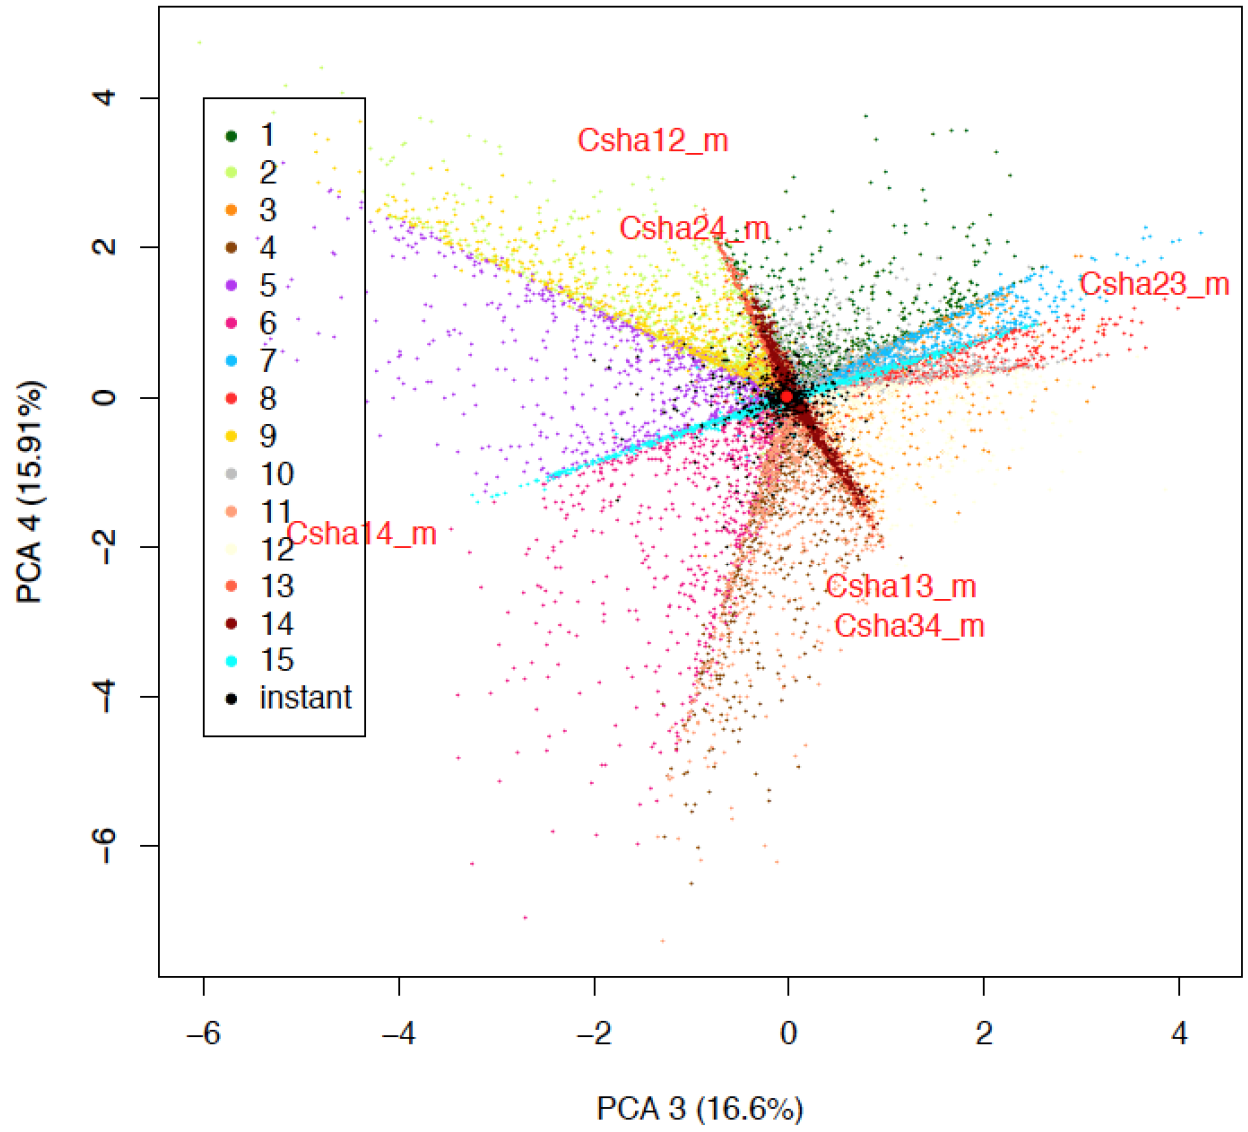

c

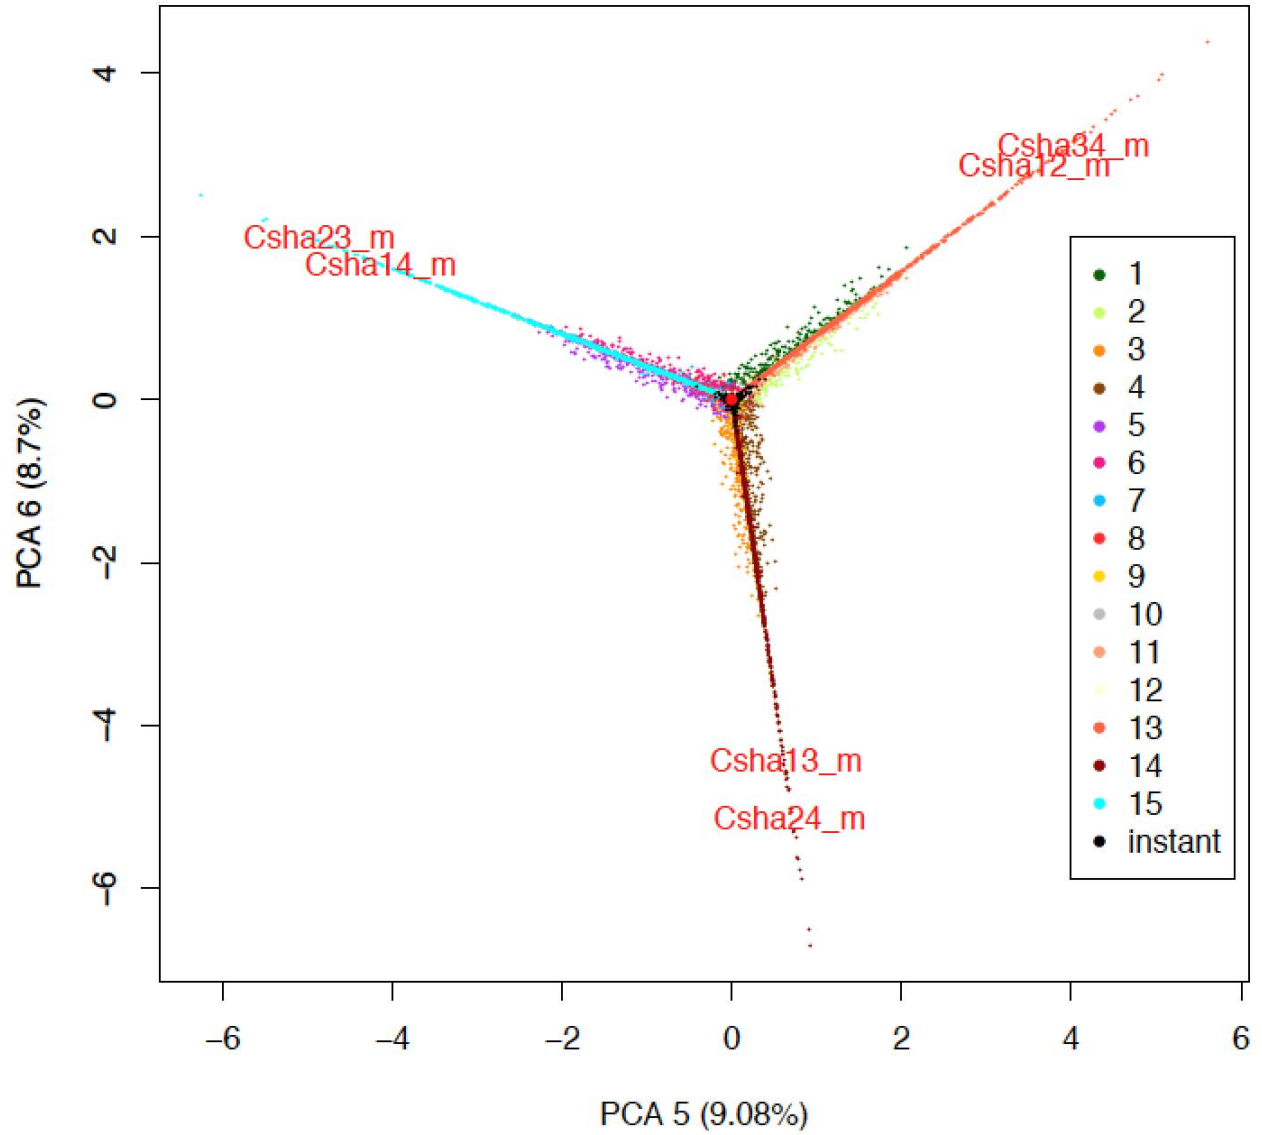

**Figure S8** PCs 1 and 2 (A), 3 and 4 (B) and 5 and 6 (C) of 1,000 simulated sets of summary statistics (mean shared sites for all pairwise comparison) from each 15 bifurcating topology models and the 4-way hard polytomy model as well as the observed data in red for non-genic loci. Model numbers correspond to the topologies given in Table S12. The *E* model was applied to these simulations.
