# Supplementary material
Source: PubMed Central journal article supplement (PMC4423371)
Supplement: supp_115.174425_FigureS11.pdf [file supp_115.174425_FigureS11.pdf]

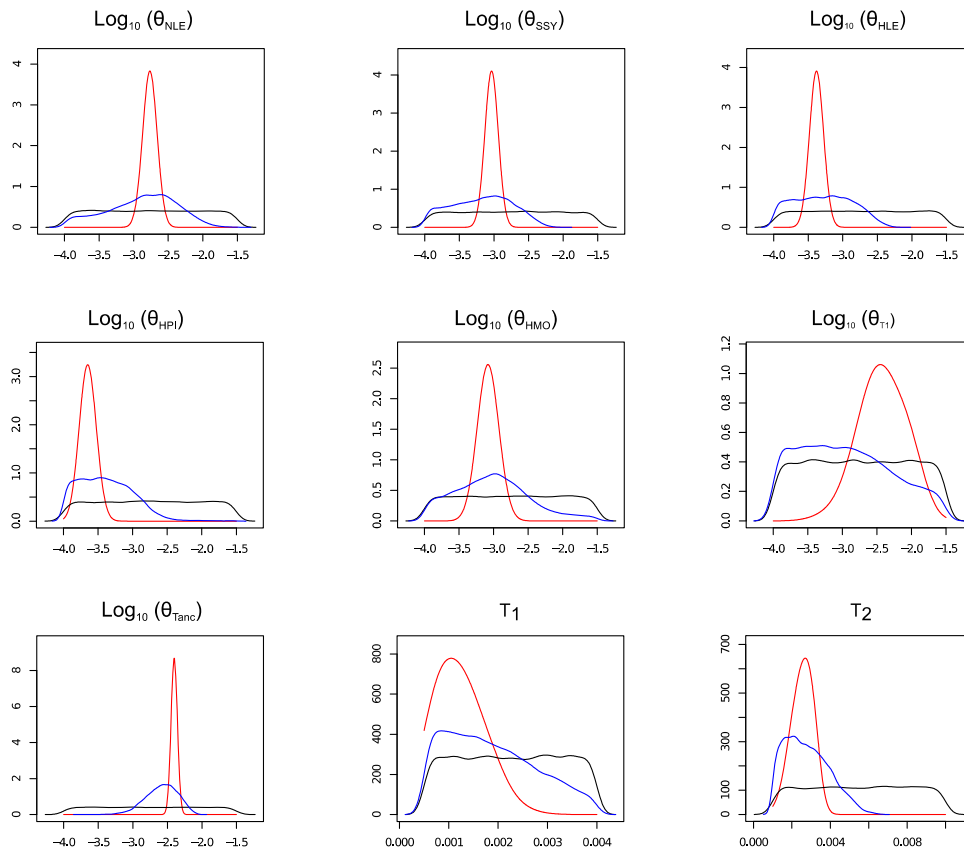

**Figure S11** Posterior distributions for the instantaneous speciation model for gibbon genera using flat priors for  $\tau$ .
