# Supplementary material
Source: PubMed Central journal article supplement (PMC4423371)
Supplement: supp_115.174425_FigureS12.pdf [file supp_115.174425_FigureS12.pdf]

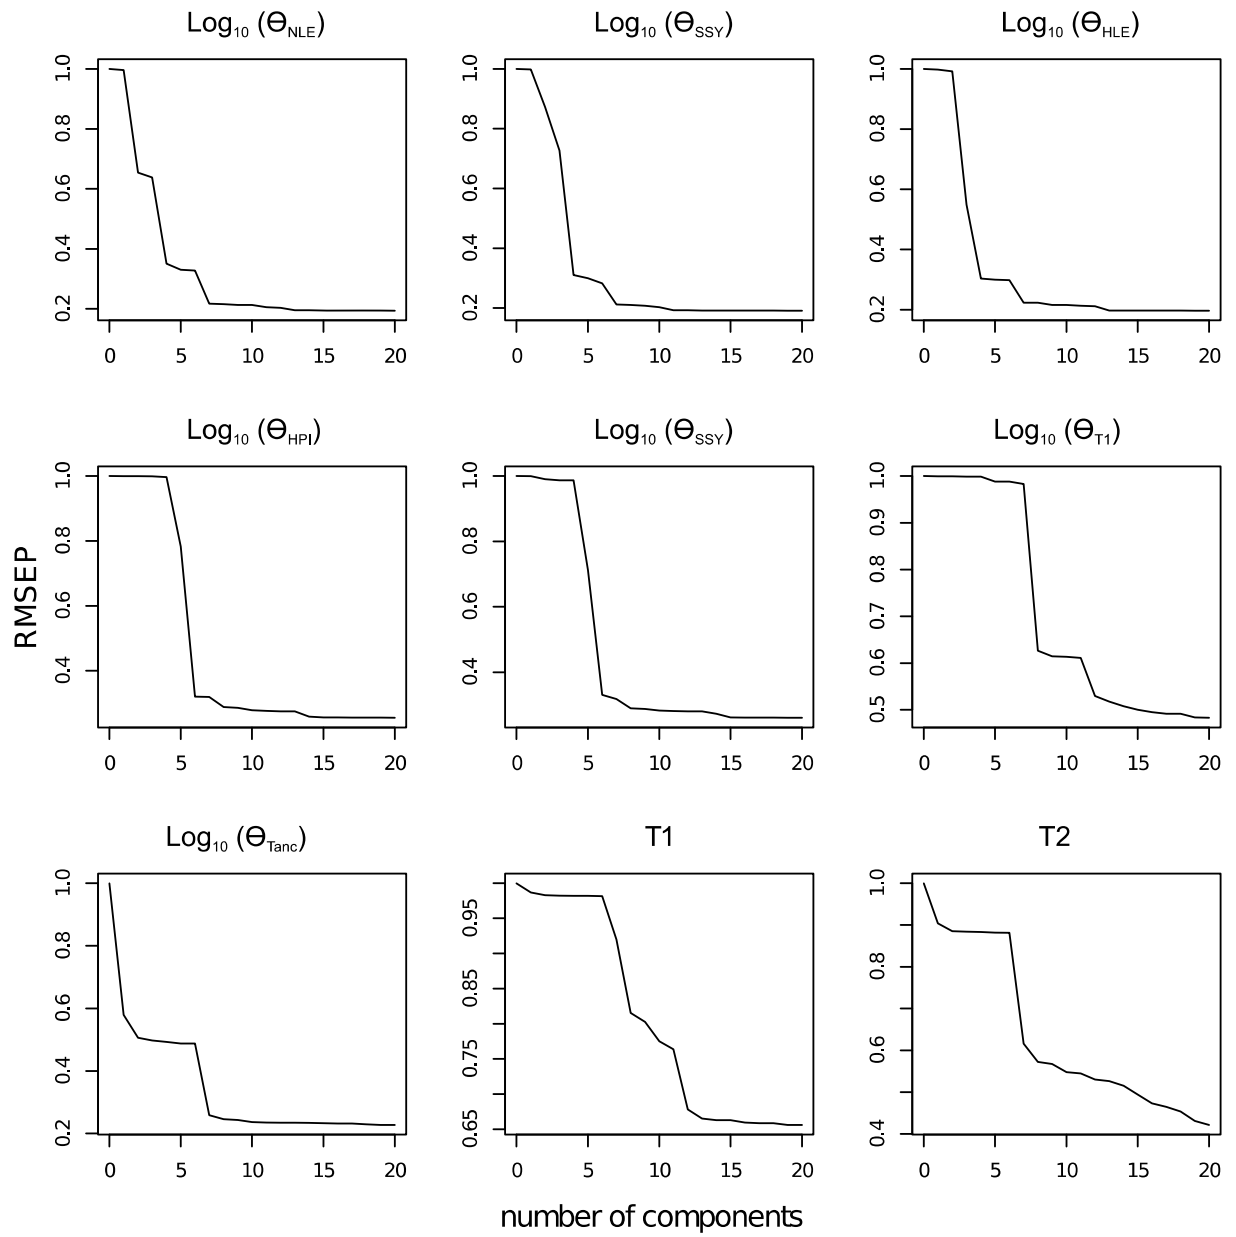

**Figure S12** RMSE of PLS components for the instantaneous speciation model for gibbon genera using flat priors for  $\tau$ .
