# Supplementary material
Source: PubMed Central journal article supplement (PMC4423371)
Supplement: supp_115.174425_FigureS14.pdf [file supp_115.174425_FigureS14.pdf]

A

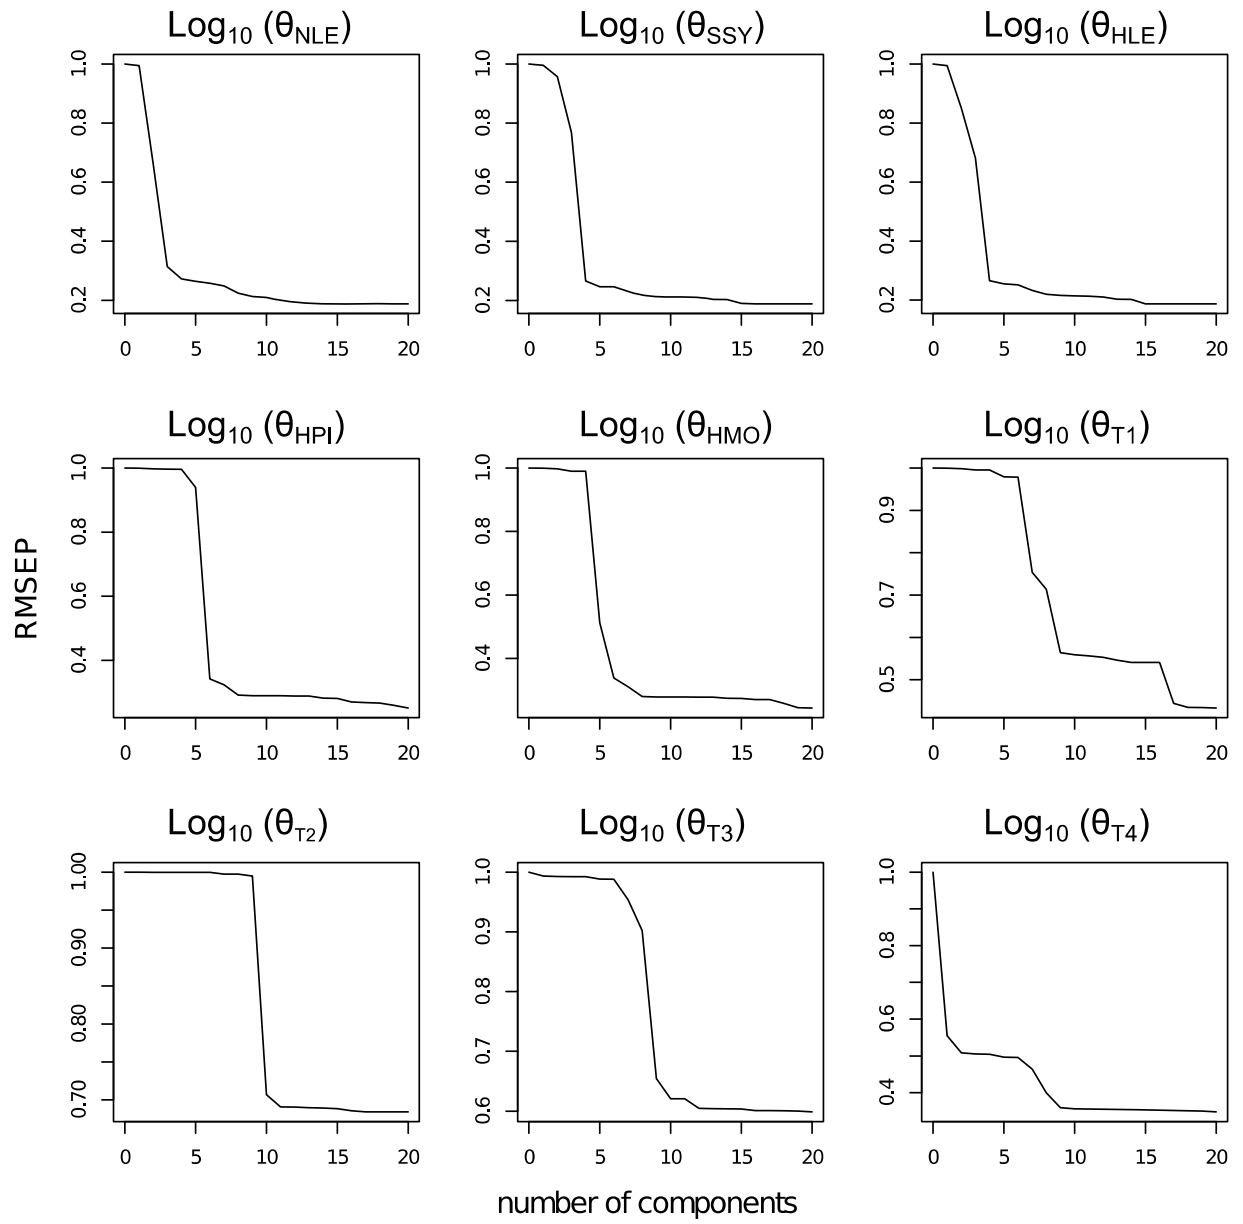

**B**

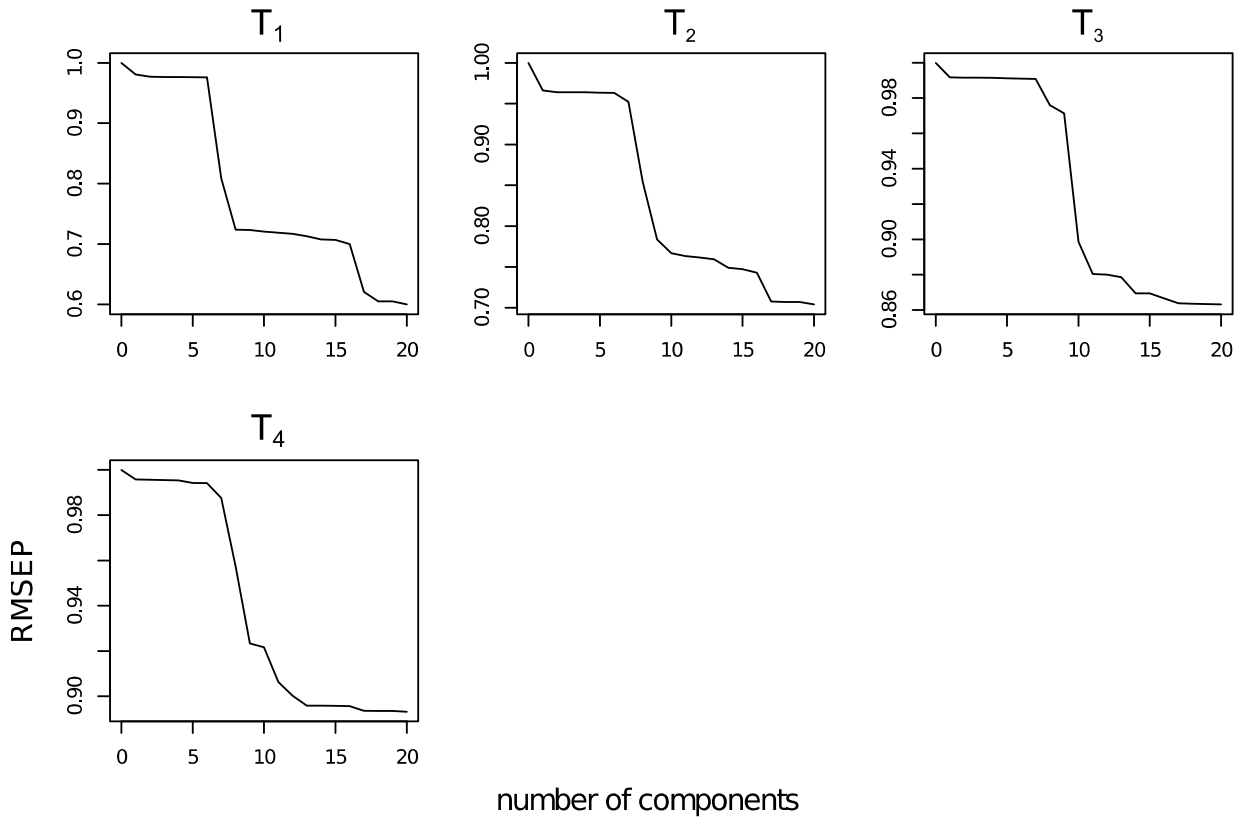

**Figure S14** RMSE of PLS components for the bifurcating speciation model for gibbon genera for  $\theta$  (A) and  $\tau$  (B) parameters.
