# Supplementary material
Source: PubMed Central journal article supplement (PMC4423371)
Supplement: supp_115.174425_FigureS17.pdf [file supp_115.174425_FigureS17.pdf]

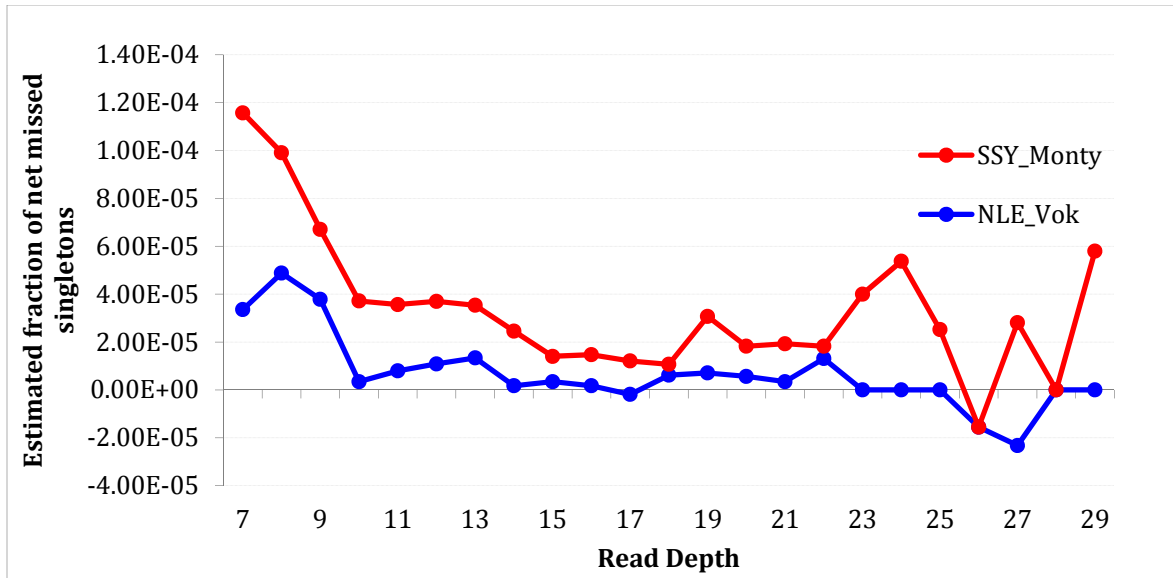

**Figure S17** Net missed singletons per base, as a function of read depth. The net missed singletons per base is computed on the intersection of the exome-capture and the whole genome data, and is given as a function of the read-depth in the whole genome data. Due to sampling variance, there is modest variance in this function, but nevertheless error rates initially are high, then decrease, and then slightly increase again.
