# Supplementary material
Source: PubMed Central journal article supplement (PMC4423371)
Supplement: supp_115.174425_FigureS18.pdf [file supp_115.174425_FigureS18.pdf]

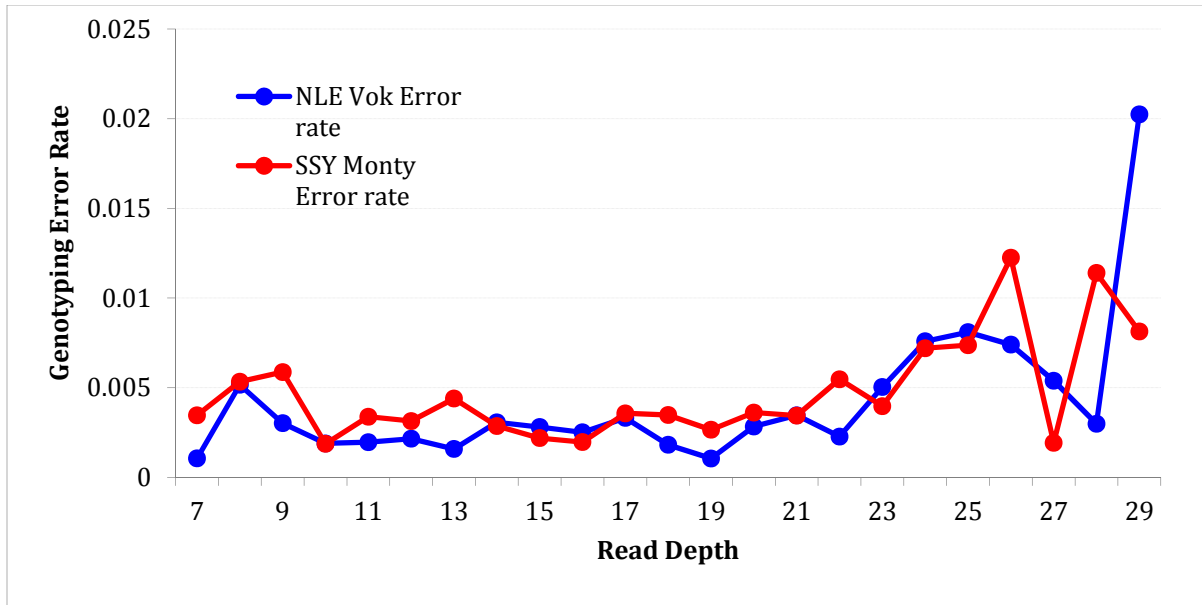

**Figure S18** Genotyping error rates. For sites not called as singletons in the whole genome data, the error rate (defined as the probability of a miscall), is given as a function of the read-depth. Even after filtering CNV regions, error rates increase at high read-depth.
