# Supplementary material
Source: PubMed Central journal article supplement (PMC4423371)
Supplement: supp_115.174425_FigureS19.pdf [file supp_115.174425_FigureS19.pdf]

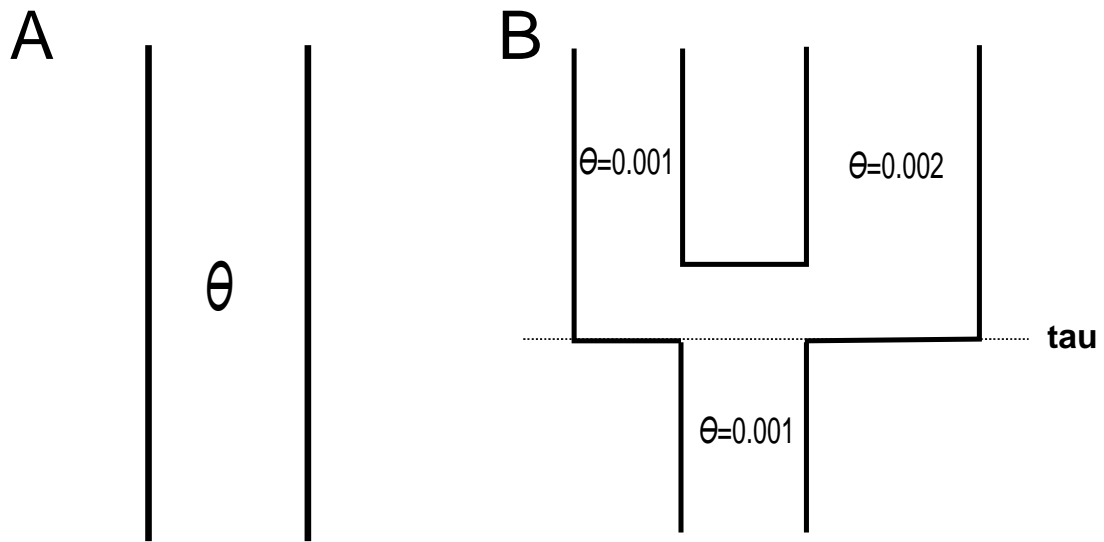

**Figure S19** The two demographic scenarios, A and B, used to examine the effect of our E model for inferring  $\theta$  and  $\tau$ .
