# Supplementary material
Source: PubMed Central journal article supplement (PMC4423371)
Supplement: supp_115.174425_FigureS20.pdf [file supp_115.174425_FigureS20.pdf]

A

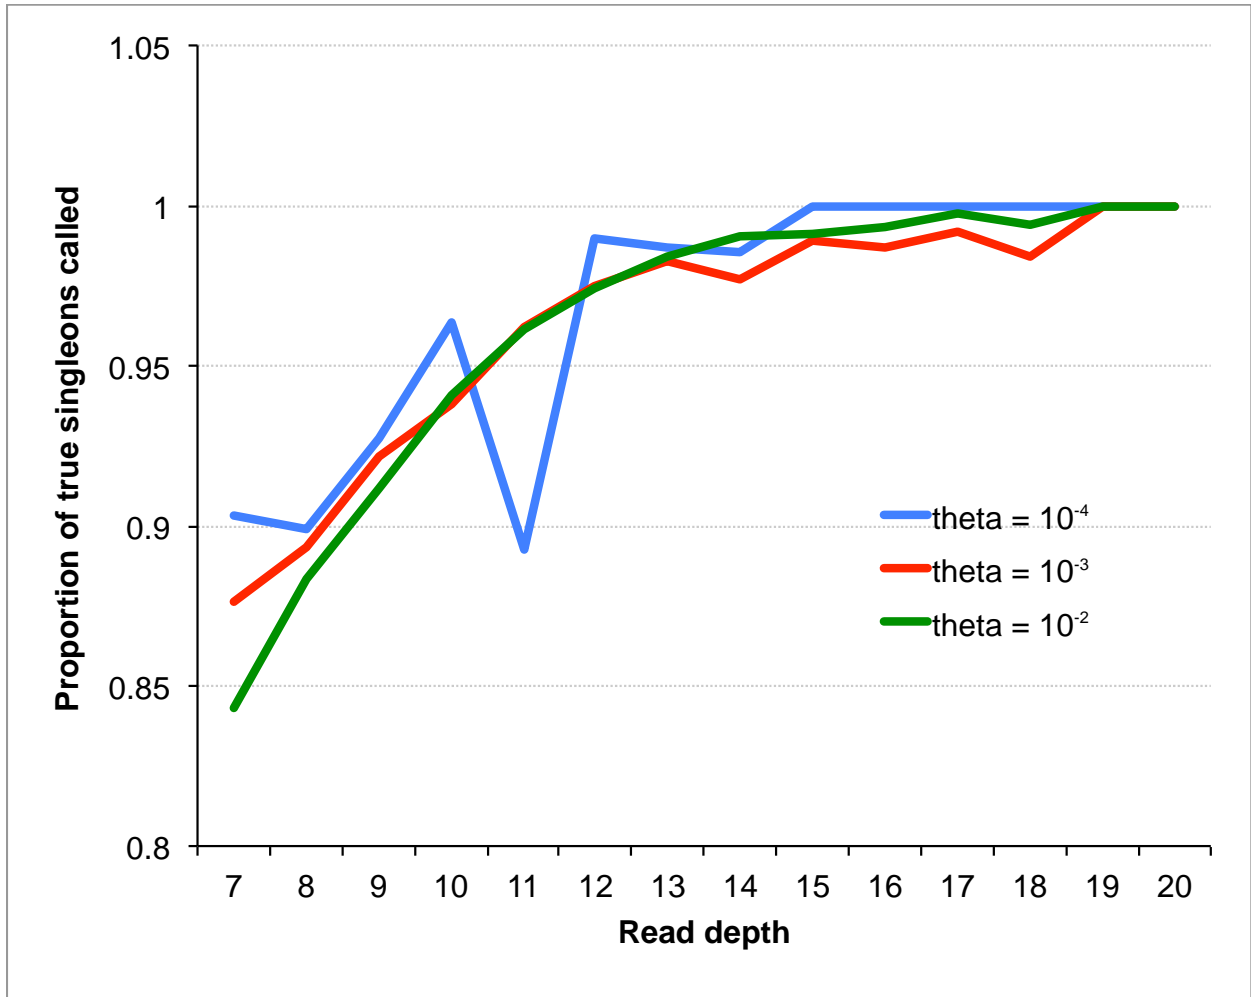

B

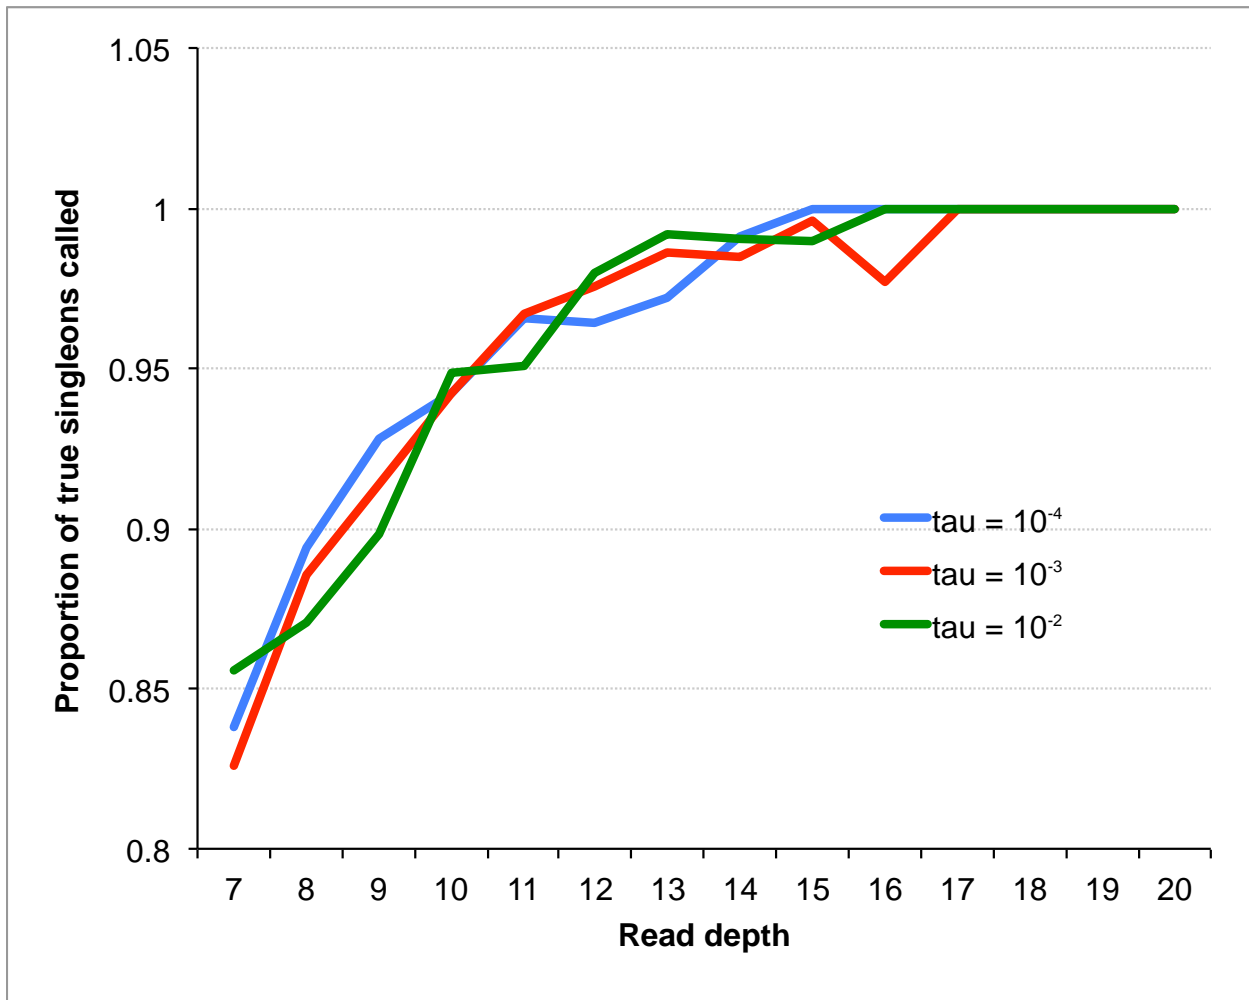

c

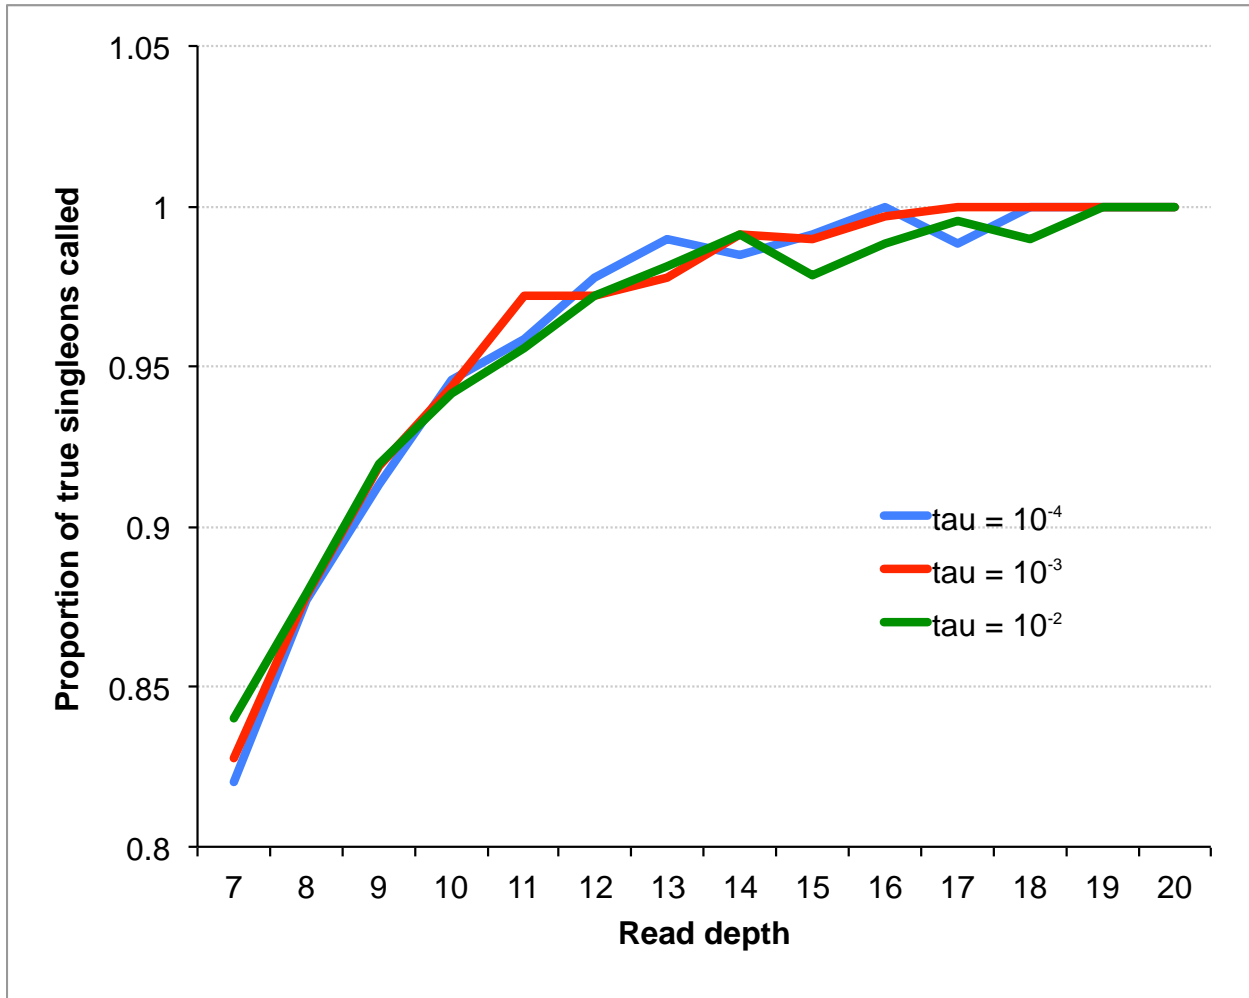

**Figure S20** Proportion of true singletons called at a given read depth under scenario A for the reference target individual under three different  $\theta$  values (A), under scenario B for the reference target individual under three different  $\tau$  values (B) and under scenario B for the non-reference target individual under three different  $\tau$  values (C)
