# Supplementary material
Source: PubMed Central journal article supplement (PMC4423371)

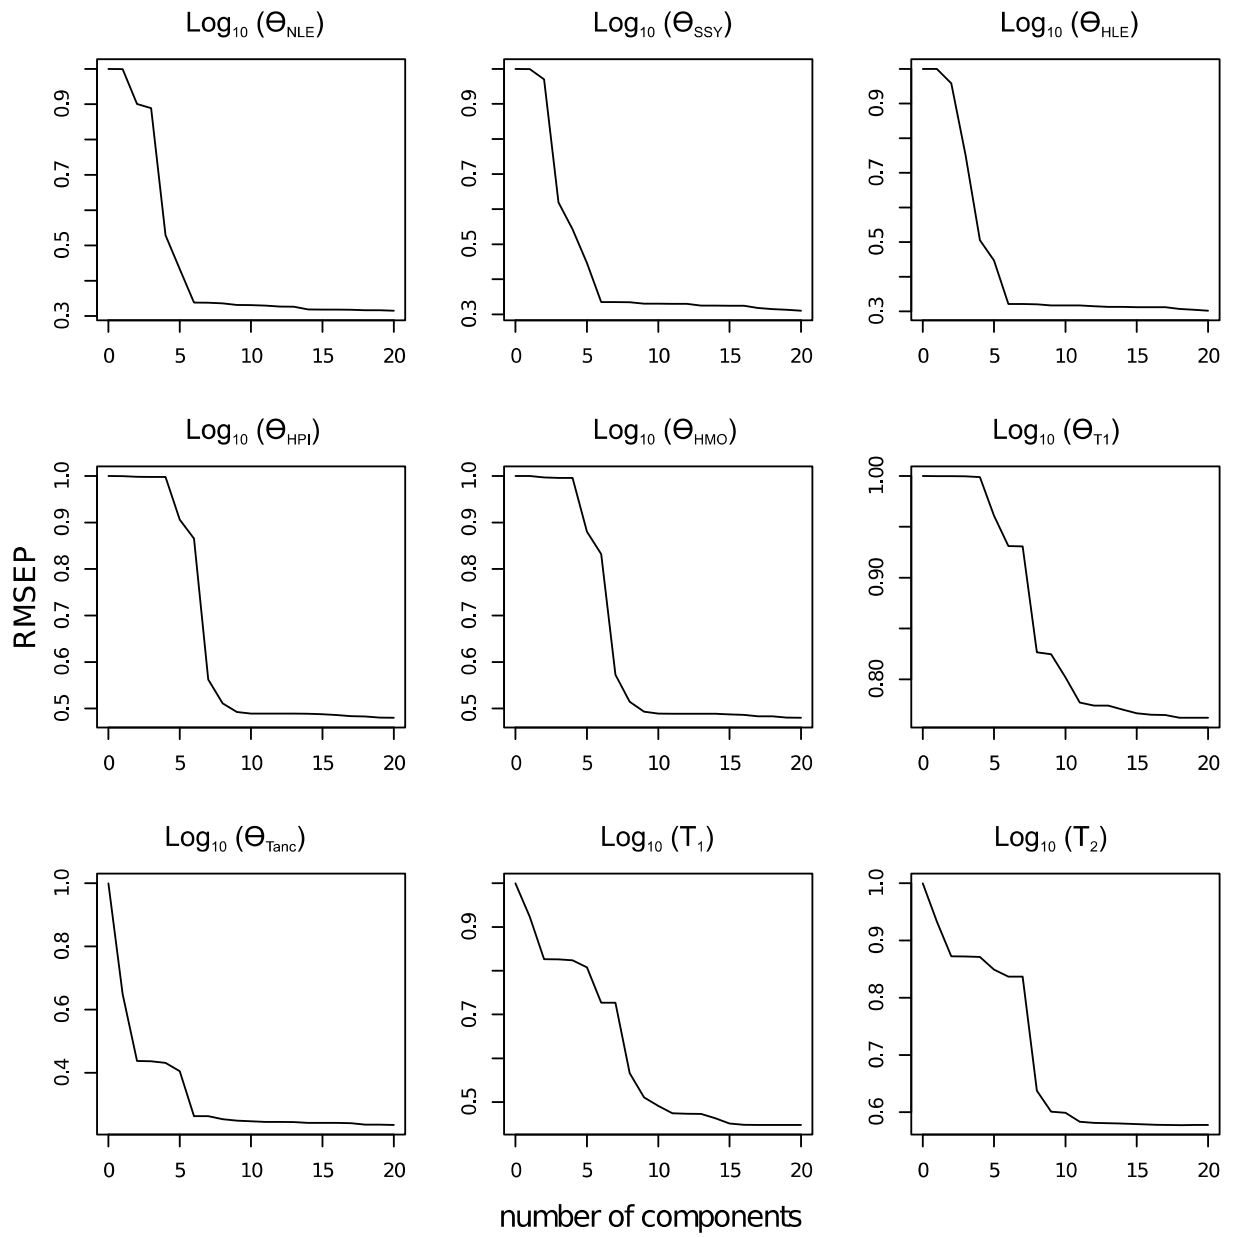

**Figure S10** RMSE of PLS components for the instantaneous speciation model for gibbon genera

Supplement: supp_115.174425_FigureS10.pdf [file supp_115.174425_FigureS10.pdf]

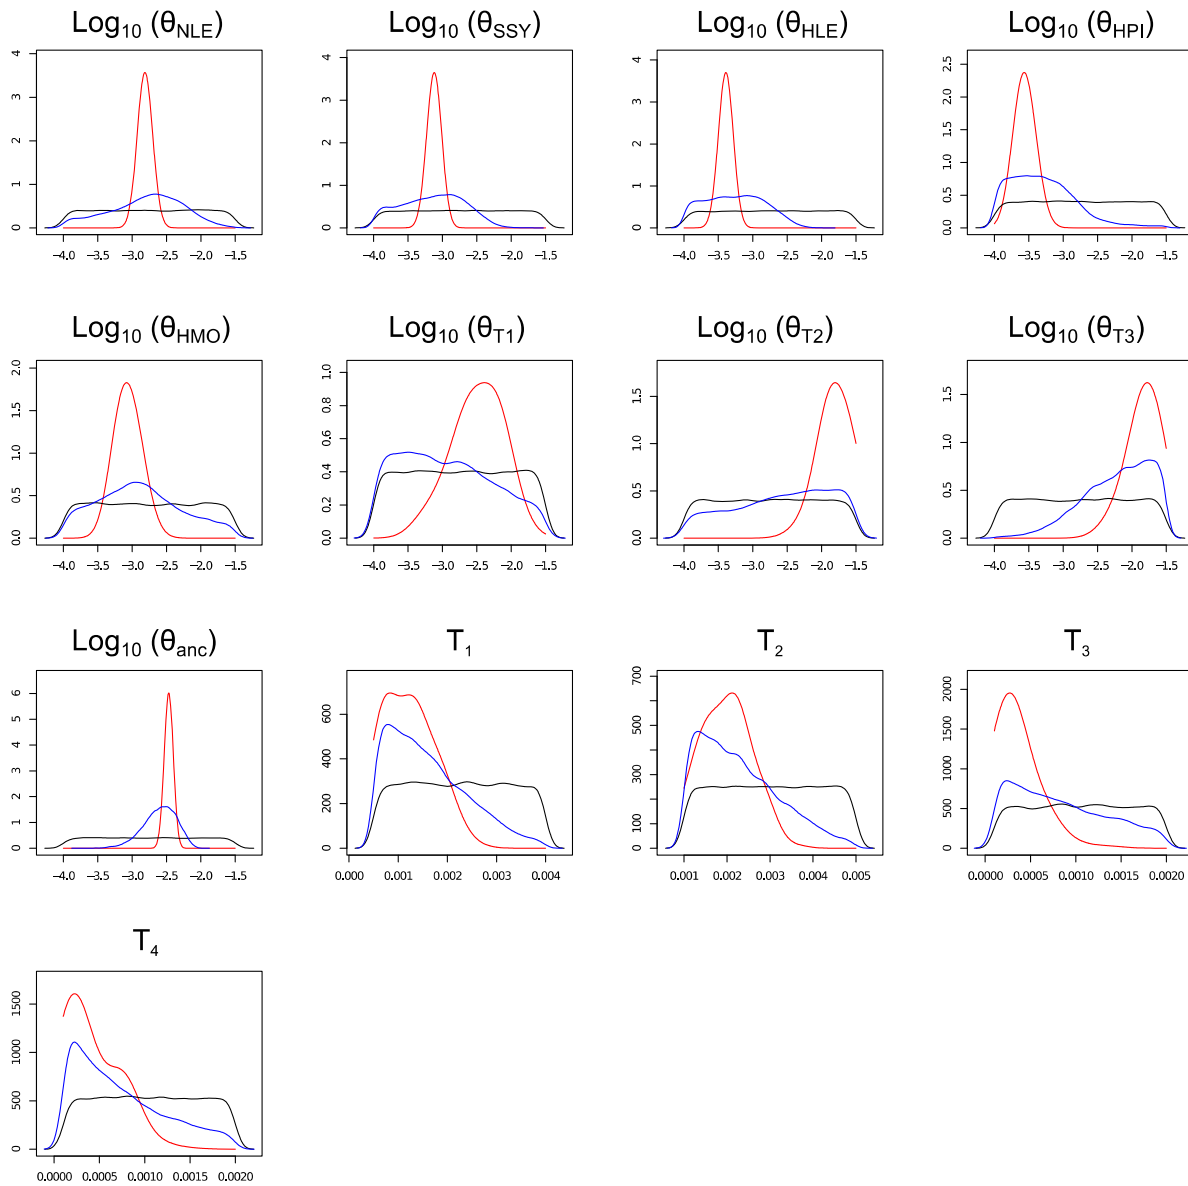

**Figure S13** Posterior distributions for a bifurcating speciation model for gibbons genera.

Supplement: supp_115.174425_FigureS13.pdf [file supp_115.174425_FigureS13.pdf]

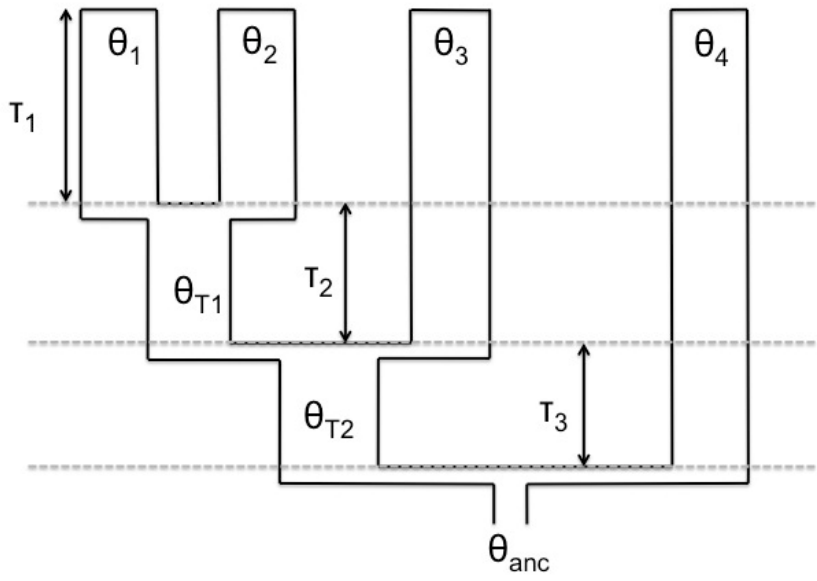

**Figure S15** Example model setup for an asymmetric phylogeny

Supplement: supp_115.174425_FigureS15.pdf [file supp_115.174425_FigureS15.pdf]

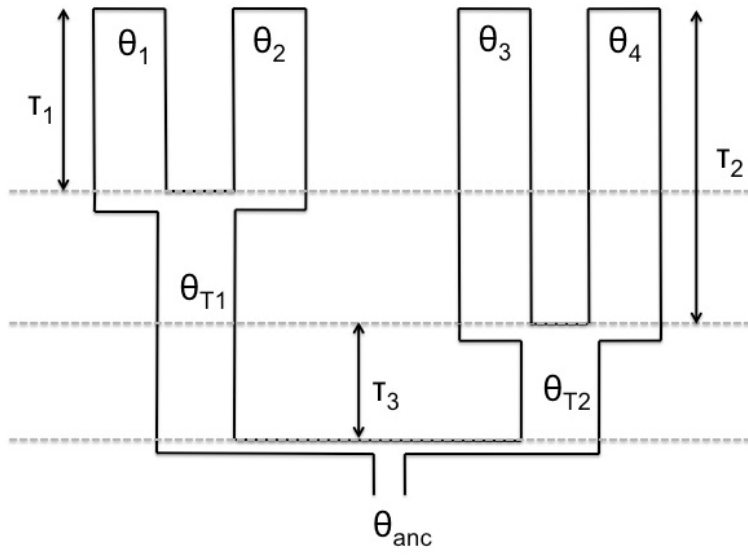

**Figure S16** Example model setup for a symmetric phylogeny

Supplement: supp_115.174425_FigureS16.pdf [file supp_115.174425_FigureS16.pdf]

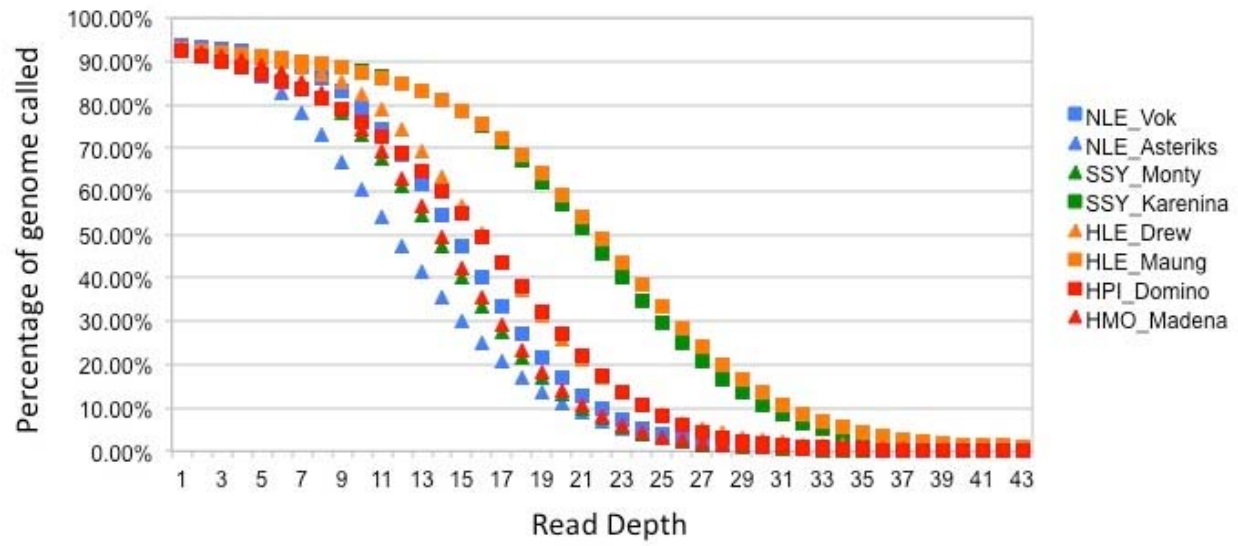

**Figure S2** Distribution of coverage in the 8 gibbon samples

Supplement: supp_115.174425_FigureS2.pdf [file supp_115.174425_FigureS2.pdf]

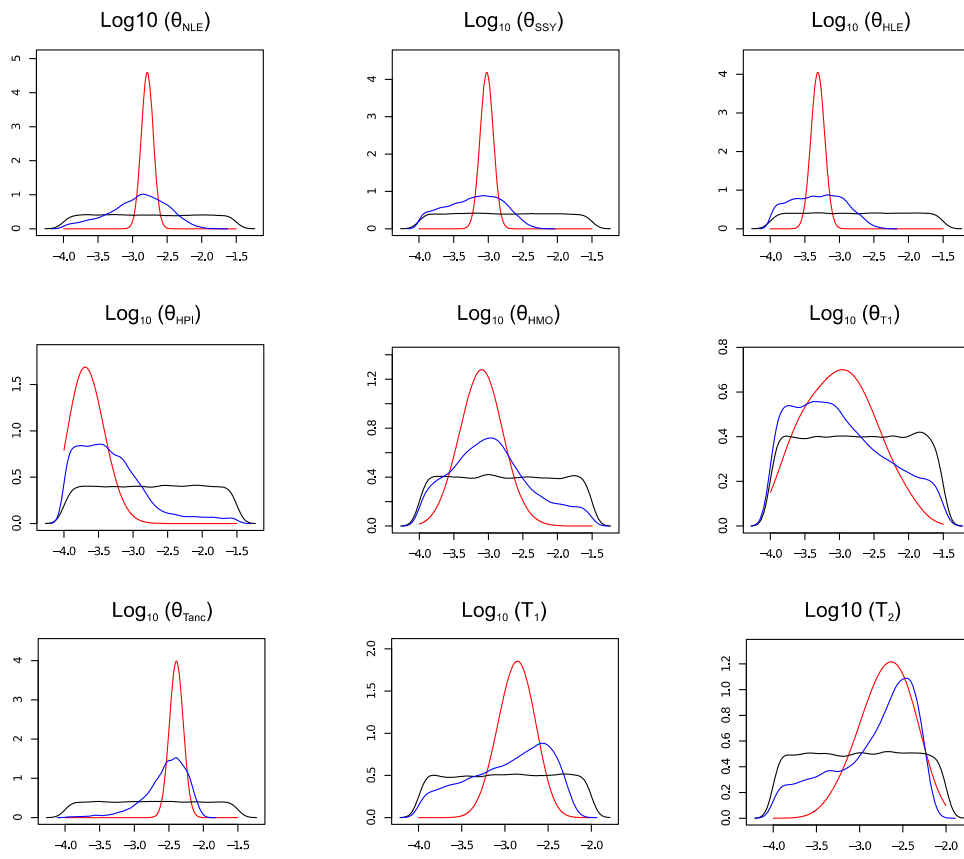

**Figure S9** Posterior distributions for the instantaneous speciation model for gibbon genera

Supplement: supp_115.174425_FigureS9.pdf [file supp_115.174425_FigureS9.pdf]
